# Supplementary material
Source: MDPI journal article supplement (https://www.mdpi.com/1424-8247/17/4/534)

## Supplementary Material

### Figure captions

**Figure S1**-The standard curve of curcumin

**Figure S2**-Optical microscope images of Car/SPI nanoparticles under different pHs. (A) pH=4.5; (B) pH=4; (C) pH=3.5; (D) pH=3.0; (E) pH=2.5

**Figure S3**-The average particle size and encapsulation efficiency of nanoparticles. \* indicates a significant difference between groups of 1:0.4 and 1:0 in particle size,  $*P<0.05$ ;  $\triangle$  represents a significant difference between groups of encapsulation efficiency,  $\triangle P<0.05$ ,  $\triangle\triangle P<0.01$ ,  $\triangle\triangle\triangle P<0.001$ .

**Figure S1**

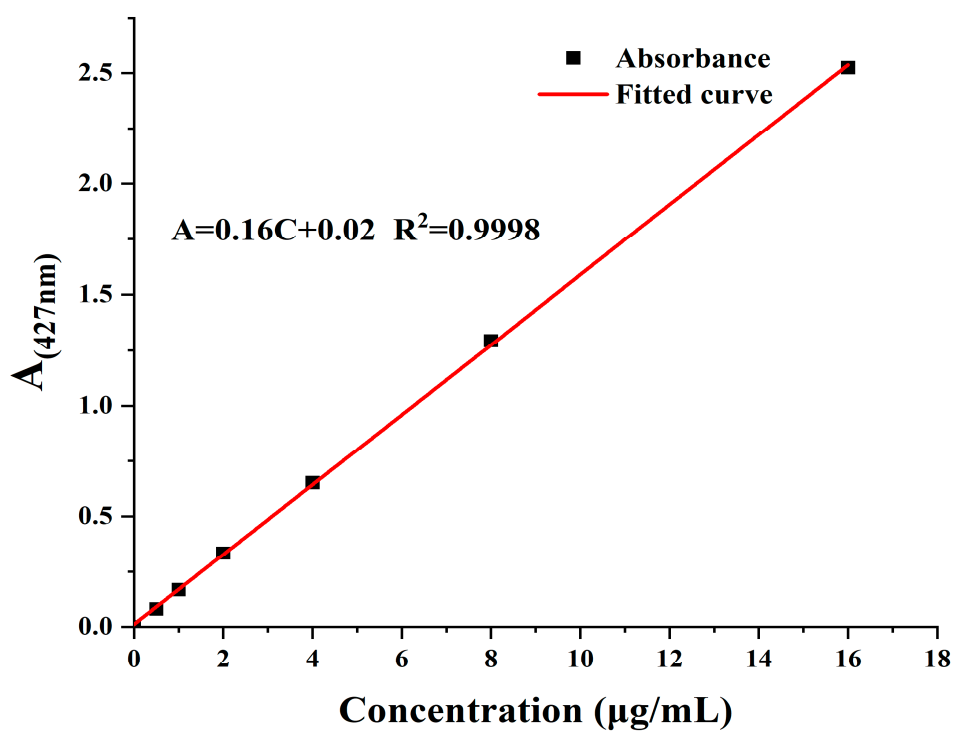

Figure S2

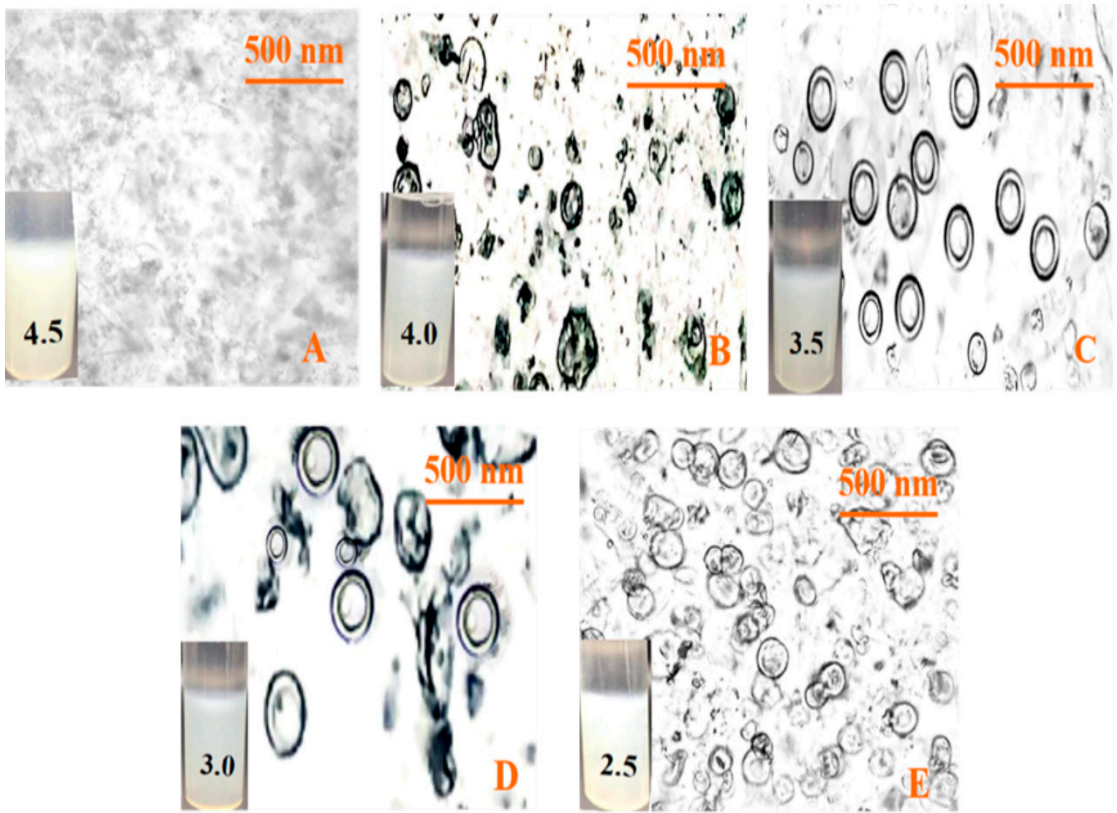

Figure S3

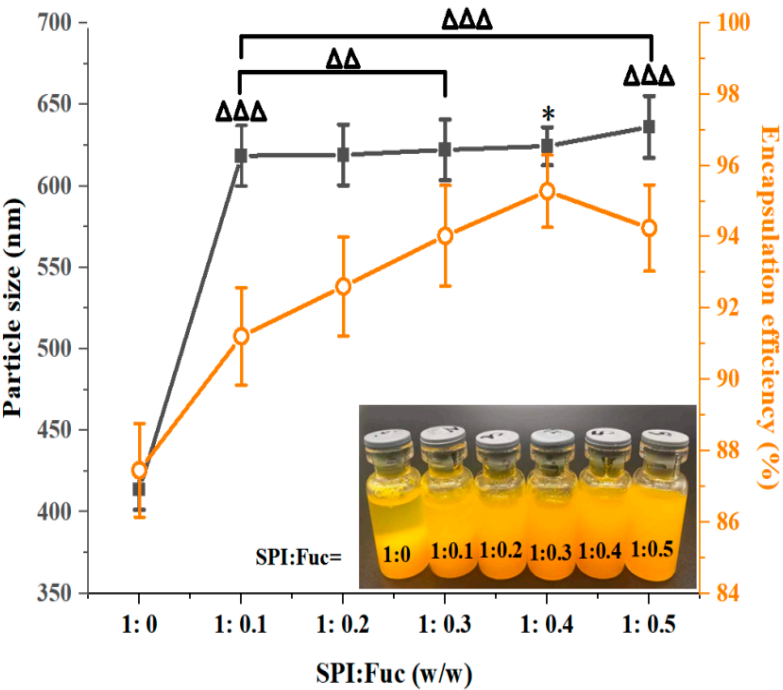

Supplement: s1 [file s1]
